# Supplementary material for: The DNA2 nuclease/helicase is an estrogen-dependent gene mutated in breast and ovarian cancers
Source: PubMed Central journal article supplement (PMC4253442; doi:10.18632/oncotarget.2414), 2014-11-01
Supplement: oncotarget-05-9396-s001.pdf [file oncotarget-05-9396-s001.pdf]

## SUPPLEMENTARY FIGURES AND TABLES

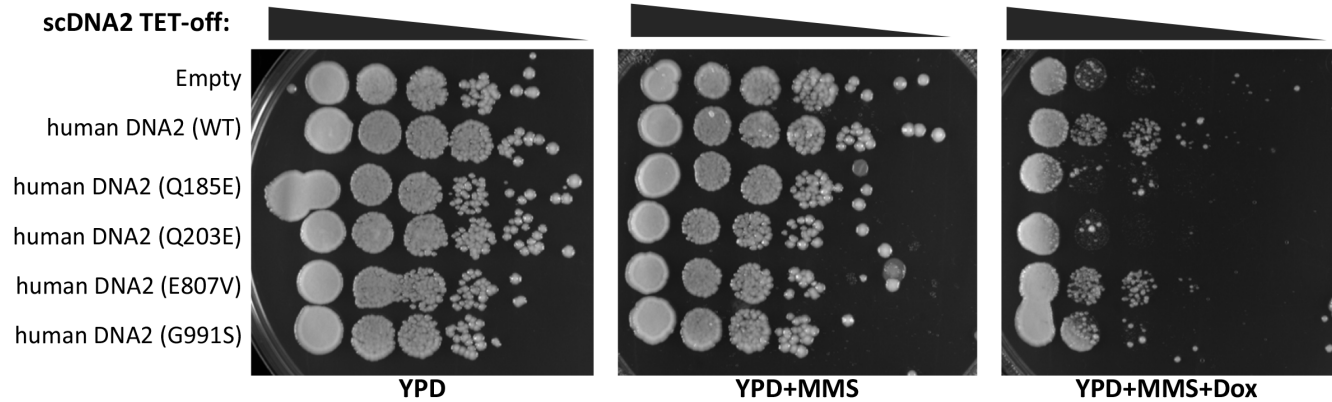

**Supplementary Figure S1: Somatic mutations found in cancer cases impair the activity of DNA2.** TET-off scDNA2 yeast cells, expressing human DNA2, WT or mutants, or a control vector, were seeded in serial dilutions and grown at 30° for 72 hours. The yeast were seeded on a control plate (YPD), on a YPD plate supplemented with MMS (0.006%; YPD+MMS) or on a YPD plate supplemented with MMS and Dox (YPD+MMS+Dox). Protein expression levels are shown in Figure 2C.

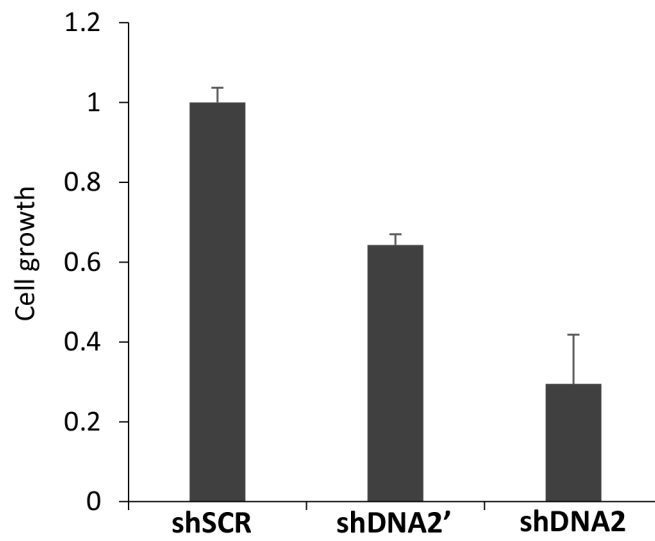

**Supplementary Figure S2: Cellular growth of MCF7 cells depleted for DNA2.** MCF7 cells infected with shDNA2, shDNA2' or with a control vector (shSCR), were plated in a 96-well plate at equal numbers. Cellular growth was measured after 72 hours.

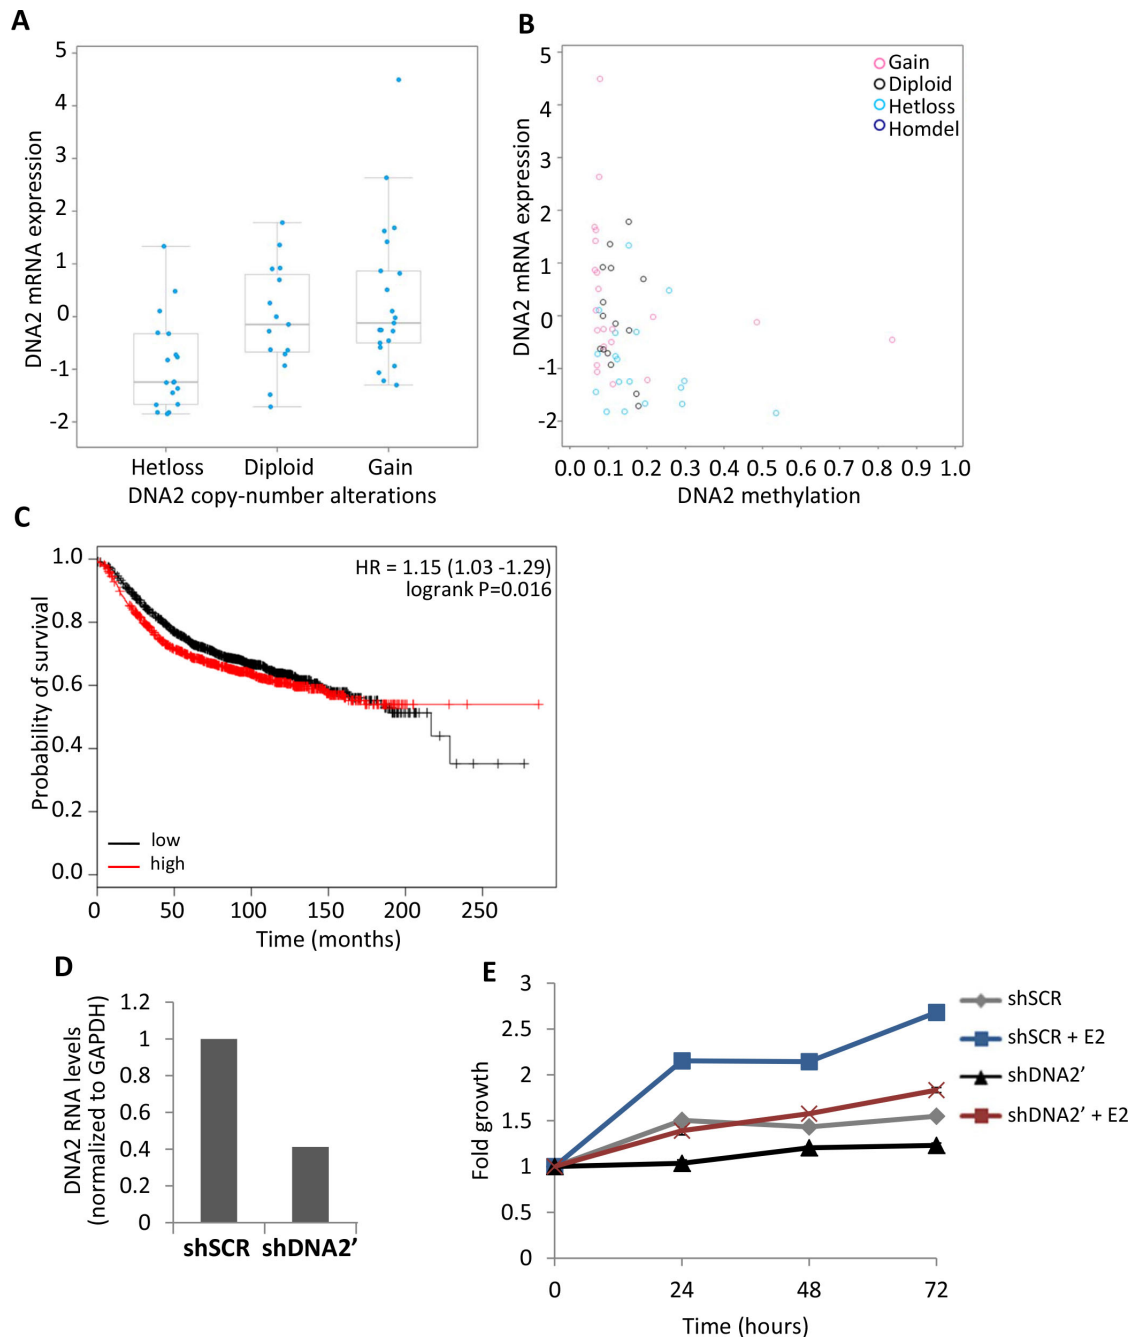

### Supplementary Figure S3: Higher DNA2 expression levels correlates with poor prognosis in breast cancer patients.

(A, B) DNA2 expression levels in 54 uterine carcinosarcomas (TCGA database) were analyzed using cBioPortal, and compared to CNA of DNA2 (A) or to the methylation levels of DNA2 in the same tumors (B). The whiskers in the box plot represent the 10<sup>th</sup> and the 90<sup>th</sup> percentile. (C) Kaplan-Meier (KM) overall survival curves among 2,878 breast cancer patients according to the levels of DNA2 expression (black curve = cutoff of 50% low expression; red curve = 50% high expression). (D, E) MCF7 cells were infected with shDNA2' or with a control (shSCR), and grown in phenol red-free media with charcoal cleaned serum. Cells were plated in a 96-well plate, 24 h prior to the experiment. E2 (final concentration 10  $\mu$ M) or ethanol were supplemented at time 0h. Expression levels of DNA2 were tested at time 0 by real-time PCR and normalized by the expression of GAPDH (D). Cells were fixed at indicated time points and cellular growth was measured and compared to day 0 (E).

**Supplementary Table S1: List of genes upregulated by estrogen in MCF7 cells.** Analysis of expression arrays from the GEO (experiments GDS3285 (3h and 6h time points) and GDS3315 (24h time point)). The ratio in gene expression between cells treated with E2 and mock treated was calculated for each experiment. Indicated in the ratio column is the highest ratio obtained for each gene, and in the study column the experiment that demonstrated this ratio.

**Supplementary Table S2: Mutation analysis of DDR genes that are upregulated by estrogen in breast cancer.** The genes listed are upregulated by estrogen (Supplementary Table S1) and involved in the DDR according to the DAVID annotation clustering tool. The proportion of tumors harboring a non-silent mutation in these genes was statistically analyzed in the dbGaP breast cancer database. P-values- the probability for receiving the mutation proportion for each gene randomly.

| Gene    | p-Value  |
|---------|----------|
| ATR     | 0.00259  |
| ATRX    | 1.4E-07  |
| BARD1   | 0.034299 |
| BLM     | <10E-08  |
| BRCA1   | <10E-08  |
| BRCA2   | <10E-08  |
| BRCC3   | 0.000177 |
| BRIP1   | 1.2E-07  |
| CASC5   | 1E-08    |
| CEP63   | 0.0232   |
| CHAF1A  | 0.004019 |
| CHEK1   | 0.727078 |
| CHEK2   | 7.01E-05 |
| CLASPIN | 0.844589 |
| DNA2    | 0.09365  |
| DTL     | 0.27781  |
| ESCO2   | 0.751368 |
| EXO1    | 0.04652  |
| FANCA   | 1E-08    |
| FANCB   | 0.049008 |
| FANCD2  | 0.000131 |
| FANCI   | 0.024622 |
| FEN1    | 0.094453 |
| GEN1    | 0.797972 |
| H2AFX   | 0.003571 |
| JMY     | 0.389992 |
| MCM7    | <10E-08  |
| MCPH1   | 0.326189 |
| MRE11A  | 0.000422 |
| MSH2    | 5.14E-05 |
| MSH6    | 0.001869 |
| NBN     | 0.776462 |

(Continued)

| Gene     | p-Value  |
|----------|----------|
| NEIL3    | 0.011997 |
| NUFIP1   | 0.004242 |
| PCNA     | 0.672635 |
| PMS1     | <10E-08  |
| POLE2    | 0.174014 |
| POLI     | <10E-08  |
| POLK     | 0.792979 |
| POLQ     | 9.54E-06 |
| POT1     | 0.757161 |
| RAD50    | 0.160438 |
| RAD51    | 0.000319 |
| RAD51AP1 | 0.000431 |
| RAD54B   | <10E-08  |
| RAD54L   | 0.029537 |
| RBBP8    | 3.2E-05  |
| RBL1     | 0.007913 |
| RECQL    | 0.016521 |
| RECQL4   | 0.832126 |
| REV3L    | 0.000146 |
| RFC2     | 0.698782 |
| RIF1     | 0.000102 |
| SETMAR   | 0.019094 |
| SFPQ     | 0.023744 |
| SHPRH    | 0.000538 |
| SLK      | 0.017327 |
| TIMELESS | 0.000693 |
| TIPIN    | 0.000114 |
| TOP2A    | 0.22244  |
| TOPBP1   | 0.000191 |
| TOPORS   | 0.814687 |
| TP53BP1  | 0.021345 |
| TYMS     | 0.06028  |
| UHRF1    | 0.001069 |
| UNG      | 0.687862 |
| USP1     | 0.781066 |
| XRCC5    | 0.773132 |
| ZMAT3    | 0.681037 |

**Supplementary Table S3: Mutation analysis of DDR genes that are upregulated by estrogen in ovarian cancer.** The genes listed are upregulated by estrogen (Supplementary Table S1) and involved in the DDR according to the DAVID annotation clustering tool. The proportion of tumors harboring a non-silent mutation in these genes was statistically analyzed in the dbGaP ovarian cancer database. P-values represent the probability for receiving the mutation proportion for each gene randomly.

| Gene    | p-Value  |
|---------|----------|
| ATR     | 0.000131 |
| ATRX    | 0.315674 |
| BARD1   | 0.747774 |
| BLM     | 0.000199 |
| BRCA1   | <10E-08  |
| BRCA2   | <10E-08  |
| BRCC3   | 0.0271   |
| BRIP1   | 0.368221 |
| CASC5   | 0.847531 |
| CEP63   | 0.737253 |
| CHAF1A  | 0.270405 |
| CHEK1   | 9E-08    |
| CHEK2   | <10E-08  |
| CLASPIN | 0.809648 |
| DNA2    | 6.6E-06  |
| DTL     | 0.741152 |
| ESCO2   | 0.721398 |
| EXO1    | 0.014707 |
| FANCA   | 0.008769 |
| FANCB   | 0.758598 |
| FANCD2  | 0.431911 |
| FANCI   | 0.077515 |
| FEN1    | 0.04676  |
| GEN1    | 0.020035 |
| H2AFX   | 0.612638 |
| JMY     | 0.774215 |
| MCM7    | 0.739563 |
| MCPH1   | 0.755531 |
| MRE11A  | 0.73797  |
| MSH2    | 0.262395 |
| MSH6    | 0.00013  |
| NBN     | 0.74457  |

| Gene     | p-Value  |
|----------|----------|
| NEIL3    | 0.133433 |
| NUFIP1   | 0.702845 |
| PCNA     | 0.650511 |
| PMS1     | 0.261659 |
| POLE2    | 0.101875 |
| POLI     | 0.007722 |
| POLK     | 0.238573 |
| POLQ     | 0.106219 |
| POT1     | 0.14524  |
| RAD50    | 0.074764 |
| RAD51    | 0.033708 |
| RAD51AP1 | 0.67332  |
| RAD54B   | 0.764976 |
| RAD54L   | 0.008102 |
| RBBP8    | 0.248715 |
| RBL1     | 0.309739 |
| RECQL    | 0.151343 |
| RECQL4   | 0.797437 |
| REV3L    | 0.723577 |
| RFC2     | 0.673789 |
| RIF1     | 0.001279 |
| SETMAR   | 0.160275 |
| SFPQ     | 0.174814 |
| SHPRH    | 0.018964 |
| SLK      | 0.363913 |
| TIMELESS | 0.002747 |
| TIPIN    | 0.023115 |
| TOP2A    | <10E-08  |
| TOPBP1   | 0.113274 |
| TOPORS   | 0.000949 |
| TP53BP1  | 0.003426 |
| TYMS     | 0.664035 |
| UHRF1    | 0.74994  |
| UNG      | 8.52E-06 |
| USP1     | 0.010362 |
| XRCC5    | 0.741443 |
| ZMAT3    | 3.25E-06 |



**Supplementary Table S4: Somatic mutations in DNA2 that occurred in ovarian cancer cases.** The dbGAP database was analyzed for mutations in DNA2 gene in ovarian cancers. Position of the mutations in the genome is indicated. WT column- wild type nucleotide. Mutation column- mutation found in ovarian cancer cases. Conserved in column- indicates whether the mutations occurred at a conserved amino-acid residues.

| Position in the genome | WT | Mutation | Amino-acid residue substitution | Position in DNA2 protein | Conserved in: |               |               |
|------------------------|----|----------|---------------------------------|--------------------------|---------------|---------------|---------------|
|                        |    |          |                                 |                          | Mus musculus  | Gallus gallus | S. cerevisiae |
| chr10;69852350         | G  | C        | Q185E                           | Nuclease                 | +             | -             | -             |
| chr10;69895464         | G  | C        | Q203E                           | Nuclease                 | +             | +             | -             |
| chr10;69888981         | T  | A        | E807V                           | Helicase                 | +             | +             | +             |
| chr10;69846615         | C  | A        | G991C                           | Helicase                 | +             | +             | +             |
